# Supplementary material for: Sensitivity Analysis for Unmeasured Confounding in Meta-Analyses
Source: PubMed Central journal article supplement — J Am Stat Assoc. Author manuscript; Available in PMC 2020 Sep 25. (PMC7518377; doi:10.1080/01621459.2018.1529598), 2019-04-30
Supplement: NIHMS1520255-supplement-Supplementary_Material.pdf [file NIHMS1520255-supplement-Supplementary_Material.pdf]

# Web Appendix for: “Sensitivity Analysis for Unmeasured Confounding in Meta-Analyses”

November 14, 2018

## CONTENTS

|          |                                                   |           |
|----------|---------------------------------------------------|-----------|
| <b>1</b> | <b>Derivation of main results</b>                 | <b>3</b>  |
| 1.1      | $\hat{p}(q)$ . . . . .                            | 3         |
| 1.1.1    | Causative case . . . . .                          | 3         |
| 1.1.2    | Preventive case . . . . .                         | 3         |
| 1.2      | Standard error for $\hat{p}(q)$ . . . . .         | 3         |
| 1.2.1    | Causative case . . . . .                          | 5         |
| 1.2.2    | Preventive case . . . . .                         | 7         |
| 1.3      | $\hat{T}(r, q)$ . . . . .                         | 8         |
| 1.3.1    | Causative case . . . . .                          | 8         |
| 1.3.2    | Preventive case . . . . .                         | 8         |
| 1.4      | Standard error for $\hat{T}(r, q)$ . . . . .      | 9         |
| 1.4.1    | Causative case . . . . .                          | 9         |
| 1.4.2    | Preventive case . . . . .                         | 9         |
| 1.5      | $\hat{G}(r, q)$ . . . . .                         | 10        |
| 1.6      | Standard error for $\hat{G}(r, q)$ . . . . .      | 10        |
| 1.6.1    | Causative case . . . . .                          | 10        |
| 1.6.2    | Preventive case . . . . .                         | 11        |
| <b>2</b> | <b>Fidelity of homogeneous-bias approximation</b> | <b>11</b> |

|          |                                                                       |           |
|----------|-----------------------------------------------------------------------|-----------|
| <b>3</b> | <b>Sufficient conditions for approximate normality of bias factor</b> | <b>13</b> |
| <b>4</b> | <b>Introduction to the package EValue</b>                             | <b>14</b> |
| <b>5</b> | <b>Code to reproduce applied example</b>                              | <b>15</b> |

## 1. DERIVATION OF MAIN RESULTS

### 1.1. $\widehat{p}(q)$

#### 1.1.1 Causative case

Under the model described in the main text, we have (Ding & VanderWeele, 2016):

$$\begin{aligned} M^t + B^* &= M^c \\ \mu^t &= E[M^c - B^*] = \mu^c - \mu_{B^*} \\ \text{Var}(M^t + B^*) &= \text{Var}(M^c) \\ V^t + \sigma_{B^*}^2 &= V^c && \text{(independence)} \\ V^t &= V^c - \sigma_{B^*}^2 \end{aligned}$$

Then,  $M^t = M^c - B^*$  is the difference of correlated normal random variables, so is itself normal. By Slutsky's Theorem, replace parameters with consistent estimators:

$$P(M^t > q) \approx 1 - \Phi\left(\frac{q + \mu_{B^*} - \widehat{y}_R^c}{\sqrt{\tau_c^2 - \sigma_{B^*}^2}}\right), \tau_c^2 > \sigma_{B^*}^2$$

#### 1.1.2 Preventive case

The apparently preventive case is nearly identical.

### 1.2. Standard error for $\widehat{p}(q)$

We first establish a general result (Lemma 1.1) regarding conditions under which  $\widehat{y}_R$  and  $\tau^2$  are asymptotically independent.

**Lemma 1.1.** *Let  $\widehat{y}_R$  and  $\tau^2$  denote maximum likelihood estimates under a normal specification. Assume that  $E[y_i | \sigma_i^2] = E[y_i]$ . Then  $\widehat{y}_R$  and  $\tau^2$  are asymptotically independent.*

*Proof.* The joint log-likelihood and partial derivatives are:

$$\log \mathcal{L}(\mu, V) = -\frac{1}{2} \sum_{i=1}^k \log(2\pi(\sigma_i^2 + V)) - \frac{1}{2} \sum_{i=1}^k \frac{(y_i - \mu)^2}{\sigma_i^2 + V}$$

$$\frac{\partial \log \mathcal{L}}{\partial \mu} = -\frac{1}{2} \sum_{i=1}^k (\sigma_i^2 + V)^{-1} (-2y_i + 2\mu)$$

$$\begin{aligned} \frac{\partial^2 \log \mathcal{L}}{\partial \mu \partial V} &= \frac{1}{2} \sum_{i=1}^k (\sigma_i^2 + V)^{-2} (-2y_i + 2\mu) \\ &= -\frac{1}{2} \sum_{i=1}^k \frac{2y_i - 2\mu}{\sigma_i^4 + 2\sigma_i^2 V + V^2} \end{aligned}$$

The off-diagonal element of the expected Fisher information matrix is therefore:

$$\begin{aligned} \mathcal{I}_{12} &= -E \left[ \frac{\partial^2 \log \mathcal{L}}{\partial \mu \partial V} \right] \\ &= \frac{1}{2} k E \left[ \frac{2y_i - 2\mu}{\sigma_i^4 + 2\sigma_i^2 V + V^2} \right] \end{aligned}$$

By a second-order Taylor series expansion, we have, for general random variables  $X$  and  $Y$ :

$$E[X/Y] \approx \frac{E[X]}{E[Y]} - \frac{\text{Cov}(X, Y)}{E[Y]^2} + \frac{\text{Var}(Y)E[X]}{E[Y]^3} \quad (1.1)$$

We have  $E[2y_i - 2\mu] = 0$ , so applying Equation (1.1) with the first and third terms equal

to 0 yields:

$$\begin{aligned}
 \mathcal{I}_{12} &\approx \frac{1}{2}k \frac{E\left[(2\mu - 2y_i)(\sigma_i^4 + 2\sigma_i^2V + V^2)\right]}{E\left[\sigma_i^4 + 2\sigma_i^2V + V^2\right]^2} \\
 &= \frac{1}{2}k \frac{2\mu E[\sigma_i^4] + 4\mu V E[\sigma_i^2] + 2\mu V^2 - 2V^2 E[y_i] - 4V E[y_i \sigma_i^2] - 2E[y_i \sigma_i^4]}{E\left[\sigma_i^4 + 2\sigma_i^2V + V^2\right]^2} \\
 &= \frac{1}{2}k \frac{2\mu E[\sigma_i^4] + 4\mu V E[\sigma_i^2] + 2\mu V^2 - 2V^2\mu - 4V^4\mu E[\sigma_i^2] - 2\mu E[\sigma_i^4]}{E\left[\sigma_i^4 + 2\sigma_i^2V + V^2\right]^2} \\
 &= 0
 \end{aligned}$$

The penultimate line follows from the assumption that  $E[y_i | \sigma_i^2] = E[y_i]$ . Since the maximum likelihood estimates are asymptotically bivariate normal, asymptotic independence is established.  $\square$

### 1.2.1 Causative case

We now derive an asymptotic confidence interval for  $\hat{p}(q)$  for an apparently causative relative risk via the delta method. We assume use of the standard random-effects estimator,  $\hat{y}_R^c$ , and an arbitrary estimator  $\tau_c^2$  such that, asymptotically:

$$\begin{bmatrix} \hat{y}_R^c - M^c \\ \tau_c^2 - V^c \end{bmatrix} \approx N \left( \begin{bmatrix} 0 \\ 0 \end{bmatrix}, \underbrace{\begin{bmatrix} \text{Var}(\hat{y}_R^c) & \text{Cov}(\hat{y}_R^c, \tau_c^2) \\ \text{Cov}(\hat{y}_R^c, \tau_c^2) & \text{Var}(\tau_c^2) \end{bmatrix}}_{\Sigma/k} \right)$$

(Asymptotic normality is theoretically justified for the maximum likelihood and restricted maximum likelihood estimators  $\tau_c^2$  and, in simulations, also appears to hold for those proposed by DerSimonian & Laird (1986), Paule & Mandel (1982), Sidik & Jonkman (2005), and

Hedges & Olkin (1985).) Apply the delta method:

$$\begin{aligned}
 h(x_1, x_2) &= \hat{p}(q) = 1 - \Phi\left(\frac{q + \mu_{B^*} - x_1}{\sqrt{x_2 - \sigma_{B^*}^2}}\right) \\
 \nabla &= \begin{bmatrix} \frac{\partial h}{\partial x_1} \\ \frac{\partial h}{\partial x_2} \end{bmatrix} = \begin{bmatrix} \frac{1}{\sqrt{x_2 - \sigma_{B^*}^2}} \cdot \phi\left(\frac{q + \mu_{B^*} - x_1}{\sqrt{x_2 - \sigma_{B^*}^2}}\right) \\ \frac{1}{2} (x_2 - \sigma_{B^*}^2)^{-3/2} \cdot (q + \mu_{B^*} - x_1) \cdot \phi\left(\frac{q + \mu_{B^*} - x_1}{\sqrt{x_2 - \sigma_{B^*}^2}}\right) \end{bmatrix} \\
 &= \begin{bmatrix} \frac{1}{\sqrt{x_2 - \sigma_{B^*}^2}} \cdot \phi\left(\frac{q + \mu_{B^*} - x_1}{\sqrt{x_2 - \sigma_{B^*}^2}}\right) \\ \frac{q + \mu_{B^*} - x_1}{2(x_2 - \sigma_{B^*}^2)^{3/2}} \cdot \phi\left(\frac{q + \mu_{B^*} - x_1}{\sqrt{x_2 - \sigma_{B^*}^2}}\right) \end{bmatrix}
 \end{aligned}$$

$$\sqrt{k} [h(\hat{y}_R^c, \tau^2) - h(M^c, V)] \rightarrow N(0, \nabla' \Sigma \nabla |_{M^c, V})$$

$$\begin{aligned}
 \nabla' \Sigma \nabla &= \nabla_1 (\nabla_1 \Sigma_{11} + \nabla_2 \Sigma_{21}) + \nabla_2 (\nabla_1 \Sigma_{12} + \nabla_2 \Sigma_{22}) \\
 &= \frac{\partial h}{\partial x_1} \left( \frac{\partial h}{\partial x_1} \text{Var}(\hat{y}_R^c) + \frac{\partial h}{\partial x_2} \text{Cov}(\hat{y}_R^c, \tau_c^2) \right) \\
 &\quad + \frac{\partial h}{\partial x_2} \left( \frac{\partial h}{\partial x_1} \text{Cov}(\hat{y}_R^c, \tau_c^2) + \frac{\partial h}{\partial x_2} \text{Var}(\tau_c^2) \right)
 \end{aligned}$$

Denote consistent estimators with hats and apply Slutsky's Theorem:

$$\begin{aligned}
 \widehat{\text{Var}}(\widehat{p}(q)) &= \nabla' \Sigma \nabla |_{M^c, V^c} \\
 &\approx \frac{\widehat{\text{Var}}(\widehat{y}_R^c)}{\tau_c^2 - \sigma_{B^*}^2} \cdot \left[ \phi \left( \frac{q + \mu_{B^*} - \widehat{y}_R^c}{\sqrt{\tau_c^2 - \sigma_{B^*}^2}} \right) \right]^2 + \\
 &\quad \left( \frac{1}{\sqrt{\tau_c^2 - \sigma_{B^*}^2}} \right) \frac{q + \mu_{B^*} - \widehat{y}_R^c}{2(\tau_c^2 - \sigma_{B^*}^2)^{3/2}} \cdot \widehat{\text{Cov}}(\widehat{y}_R^c, \tau_c^2) \cdot \left[ \phi \left( \frac{q + \mu_{B^*} - \widehat{y}_R^c}{\sqrt{\tau_c^2 - \sigma_{B^*}^2}} \right) \right]^2 + \\
 &\quad \frac{\widehat{\text{Var}}(\tau_c^2) (q + \mu_{B^*} - \widehat{y}_R^c)^2}{4(\tau_c^2 - \sigma_{B^*}^2)^3} \cdot \left[ \phi \left( \frac{q + \mu_{B^*} - \widehat{y}_R^c}{\sqrt{\tau_c^2 - \sigma_{B^*}^2}} \right) \right]^2 \\
 &= \left[ \frac{\widehat{\text{Var}}(\widehat{y}_R^c)}{\tau_c^2 - \sigma_{B^*}^2} + \frac{(q + \mu_{B^*} - \widehat{y}_R^c) \widehat{\text{Cov}}(\widehat{y}_R^c, \tau_c^2)}{(\tau_c^2 - \sigma_{B^*}^2)^2} + \frac{\widehat{\text{Var}}(\tau_c^2) (q + \mu_{B^*} - \widehat{y}_R^c)^2}{4(\tau_c^2 - \sigma_{B^*}^2)^3} \right] \\
 &\quad \cdot \left[ \phi \left( \frac{q + \mu_{B^*} - \widehat{y}_R^c}{\sqrt{\tau_c^2 - \sigma_{B^*}^2}} \right) \right]^2 \\
 \\
 \widehat{\text{SE}}(\widehat{p}(q)) &\approx \sqrt{\frac{\widehat{\text{Var}}(\widehat{y}_R^c)}{\tau_c^2 - \sigma_{B^*}^2} + \frac{(q + \mu_{B^*} - \widehat{y}_R^c) \widehat{\text{Cov}}(\widehat{y}_R^c, \tau_c^2)}{(\tau_c^2 - \sigma_{B^*}^2)^2} + \frac{\widehat{\text{Var}}(\tau_c^2) (q + \mu_{B^*} - \widehat{y}_R^c)^2}{4(\tau_c^2 - \sigma_{B^*}^2)^3}} \\
 &\quad \cdot \phi \left( \frac{q + \mu_{B^*} - \widehat{y}_R^c}{\sqrt{\tau_c^2 - \sigma_{B^*}^2}} \right)
 \end{aligned}$$

For choices of estimators  $\tau_c^2$  that are asymptotically independent of  $\widehat{y}_R^c$  (which holds for the maximum likelihood estimates by Lemma 1.1 and also appears to hold for other common choices in simulations), this reduces to:

$$\widehat{\text{SE}}(\widehat{p}(q)) \approx \sqrt{\frac{\widehat{\text{Var}}(\widehat{y}_R^c)}{\tau_c^2 - \sigma_{B^*}^2} + \frac{\widehat{\text{Var}}(\tau_c^2) (q + \mu_{B^*} - \widehat{y}_R^c)^2}{4(\tau_c^2 - \sigma_{B^*}^2)^3}} \cdot \phi \left( \frac{q + \mu_{B^*} - \widehat{y}_R^c}{\sqrt{\tau_c^2 - \sigma_{B^*}^2}} \right)$$

### 1.2.2 Preventive case

For an apparently preventive relative risk, there is simply a sign change in the numerators:

$$\widehat{\text{SE}}(\widehat{p}(q)) \approx \sqrt{\frac{\widehat{\text{Var}}(\widehat{y}_R^c)}{\tau_c^2 - \sigma_{B^*}^2} + \frac{\widehat{\text{Var}}(\tau_c^2) (q - \mu_{B^*} - \widehat{y}_R^c)^2}{4(\tau_c^2 - \sigma_{B^*}^2)^3}} \cdot \phi \left( \frac{q - \mu_{B^*} - \widehat{y}_R^c}{\sqrt{\tau_c^2 - \sigma_{B^*}^2}} \right)$$

### 1.3. $\widehat{T}(r, q)$

#### 1.3.1 Causative case

Simply solve  $\widehat{p}(q)$  for  $\mu_{B^*}$ , setting the latter equal to  $\log \widehat{T}(r, q)$  and setting  $\sigma_{B^*}^2 = 0$ :

$$r = 1 - \Phi \left( \frac{q + \log \widehat{T}(r, q) - \widehat{y}_R^c}{\sqrt{\tau_c^2}} \right)$$

$$\Phi^{-1}(1 - r) = \frac{q + \log \widehat{T}(r, q) - \widehat{y}_R^c}{\sqrt{\tau_c^2}}$$

$$\widehat{T}(r, q) = \exp \left\{ \Phi^{-1}(1 - r) \sqrt{\tau_c^2} - q + \widehat{y}_R^c \right\}$$

#### 1.3.2 Preventive case

$$r = \Phi \left( \frac{q - \log \widehat{T}(r, q) - \widehat{y}_R^c}{\sqrt{\tau_c^2}} \right)$$

$$\Phi^{-1}(r) = \frac{q - \log \widehat{T}(r, q) - \widehat{y}_R^c}{\sqrt{\tau_c^2}}$$

$$\widehat{T}(r, q) = \exp \left\{ q - \widehat{y}_R^c - \Phi^{-1}(r) \sqrt{\tau_c^2} \right\}$$



## 1.4. Standard error for $\widehat{T}(r, q)$

### 1.4.1 Causative case

Apply the delta method:

$$\begin{aligned}
 h(x_1, x_2) &= \widehat{T}(r, q) = \exp \{x_2^{1/2} (\Phi^{-1}(1-r)) - q + x_1\} \\
 \nabla &= \begin{bmatrix} \frac{\partial h}{\partial x_1} \\ \frac{\partial h}{\partial x_2} \end{bmatrix} = \begin{bmatrix} \exp \{x_2^{1/2} (\Phi^{-1}(1-r)) - q + x_1\} \\ \exp \{x_2^{1/2} (\Phi^{-1}(1-r)) - q + x_1\} \cdot \Phi^{-1}(1-r) \cdot \frac{1}{2}x_2^{-1/2} \end{bmatrix} \\
 \widehat{\text{Var}}(\widehat{T}(r, q)) &= \nabla' \Sigma \nabla |_{M^c, V^c} \\
 &\approx \left( \exp \{ \sqrt{(\tau_c^2)} (\Phi^{-1}(1-r)) - q + \widehat{y}_R^c \} \right)^2 \\
 &\quad \left( \widehat{\text{Var}}(\widehat{y}_R^c) + \frac{(2\widehat{\text{Cov}}(\widehat{y}_R^c, \tau_c^2) + \widehat{\text{Var}}(\tau_c^2)) (\Phi^{-1}(1-r))^2}{4\tau_c^2} \right) \\
 \widehat{\text{SE}}(\widehat{T}(r, q)) &= \exp \left\{ \sqrt{\tau_c^2} (\Phi^{-1}(1-r)) - q + \widehat{y}_R^c \right\} \\
 &\quad \sqrt{\widehat{\text{Var}}(\widehat{y}_R^c) + \frac{(2\widehat{\text{Cov}}(\widehat{y}_R^c, \tau_c^2) + \widehat{\text{Var}}(\tau_c^2)) (\Phi^{-1}(1-r))^2}{4\tau_c^2}}
 \end{aligned}$$

For estimators such that  $\widehat{y}_R^c$  is asymptotically independent of  $\tau_c^2$ :

$$\widehat{\text{SE}}(\widehat{T}(r, q)) = \exp \left\{ \sqrt{\tau_c^2} (\Phi^{-1}(1-r)) - q + \widehat{y}_R^c \right\} \sqrt{\widehat{\text{Var}}(\widehat{y}_R^c) + \frac{\widehat{\text{Var}}(\tau_c^2) (\Phi^{-1}(1-r))^2}{4\tau_c^2}} \quad (1.2)$$

### 1.4.2 Preventive case

For the apparently preventive case under asymptotic independence, there is a sign change, and the cumulative distribution function is evaluated at  $r$  instead of  $1-r$ :

$$\widehat{\text{SE}}(\widehat{T}(r, q)) = \exp \left\{ q - \widehat{y}_R^c - \sqrt{\tau_c^2} (\Phi^{-1}(r)) \right\} \sqrt{\widehat{\text{Var}}(\widehat{y}_R^c) + \frac{\widehat{\text{Var}}(\tau_c^2) (\Phi^{-1}(r))^2}{4\tau_c^2}} \quad (1.3)$$

1.5.  $\widehat{G}(r, q)$ 

Set  $B^* = \log B^+$  and  $\widehat{G}(r, q) = RR_{XU} = RR_{UY}$ :

$$B^* = \log \left( \frac{\widehat{G}(r, q)^2}{2\widehat{G}(r, q) - 1} \right)$$

$$0 = \widehat{G}(r, q)^2 - 2 \exp(B^*) \widehat{G}(r, q) + \exp(B^*)$$

Apply the quadratic formula:

$$\widehat{G}(r, q) = \exp(B^*) + \sqrt{(\exp(B^*))^2 - \exp(B^*)}$$

 1.6. Standard error for  $\widehat{G}(r, q)$ 

Apply the delta method to transform  $\widehat{T}(r, q)$  into  $\widehat{G}(r, q)$ :

$$h(x) = x + \sqrt{x^2 - x}$$

$$\frac{dh}{dx} = 1 + \frac{2x - 1}{2\sqrt{x^2 - x}}$$

$$\widehat{\text{Var}} \left( \widehat{G}(r, q) \right) = \left( \frac{dh}{dx} \right)^2 \text{Var}(x) \Big|_{\widehat{T}(r, q)}$$

$$= \left( 1 + \frac{2\widehat{T}(r, q) - 1}{2\sqrt{\widehat{T}(r, q)^2 - \widehat{T}(r, q)}} \right)^2 \text{Var} \left( \widehat{T}(r, q) \right)$$

## 1.6.1 Causative case

Plug in variance estimator (1.2):

$$\widehat{\text{SE}} \left( \widehat{G}(r, q) \right) = \left( 1 + \frac{2\widehat{T}(r, q) - 1}{2\sqrt{\widehat{T}(r, q)^2 - \widehat{T}(r, q)}} \right) \cdot \exp \left\{ \sqrt{\tau_c^2} (\Phi^{-1}(1 - r)) - q + \widehat{y}_R^c \right\}$$

$$\cdot \sqrt{\widehat{\text{Var}}(\widehat{y}_R^c) + \frac{\widehat{\text{Var}}(\tau_c^2) (\Phi^{-1}(1 - r))^2}{4\tau_c^2}}$$

### 1.6.2 Preventive case

Plug in variance estimator (1.3):

$$\widehat{\text{SE}}\left(\widehat{G}(r, q)\right) = \left(1 + \frac{2\widehat{T}(r, q) - 1}{2\sqrt{\widehat{T}(r, q)^2 - \widehat{T}(r, q)}}\right) \cdot \exp\left\{\sqrt{\tau_c^2}(\Phi^{-1}(r)) - q - \widehat{y}_R^c\right\} \\ \cdot \sqrt{\widehat{\text{Var}}(\widehat{y}_R^c) + \frac{\widehat{\text{Var}}(\tau_c^2)(\Phi^{-1}(r))^2}{4\tau_c^2}}$$

## 2. FIDELITY OF HOMOGENEOUS-BIAS APPROXIMATION

Table 1 in the main text provides upper or lower bounds on  $\widehat{p}(q)$  that arise from assuming homogeneous bias (i.e.,  $\sigma_{B^*}^2 = 0$ ). Here, we consider how closely these bounds approximate  $\widehat{p}(q)$ . Define  $\delta = \frac{q + \mu_{B^*} - \widehat{y}_R^c}{\tau_c}$  for the apparently causative case and  $\delta = \frac{q - \mu_{B^*} - \widehat{y}_R^c}{\tau_c}$  for the apparently preventive case. This quantity represents the difference between the threshold  $q$  and the bias-corrected mean estimate  $\widehat{y}_R^t$  (i.e.,  $\widehat{y}_R^c - \mu_{B^*}$  for the causative case and  $\widehat{y}_R^c + \mu_{B^*}$  for the preventive case), standardized by  $\tau_c$ , the standard deviation of the confounded effect distribution. Let  $w = \tau_c^2 / \sigma_{B^*}^2 > 1$ , so that  $1/w$  represents the proportion of variance in the confounded effects that is due to variability across studies in unmeasured confounding bias rather than to genuine effect heterogeneity. Let  $\widetilde{p}(q)$  be the estimator  $\widehat{p}(q)$  computed with  $\sigma_{B^*}^2 = 0$ . Then, for the apparently causative case, the ratio relating the homogeneous-bias approximation to the unbiased estimate is:

$$\frac{\widetilde{p}(q)}{\widehat{p}(q)} = \frac{1 - \Phi(\delta)}{1 - \Phi\left(\delta \frac{1}{\sqrt{1 - \frac{1}{w}}}\right)} \\ = \frac{\Phi(-\delta)}{\Phi\left(-\delta \frac{1}{\sqrt{1 - \frac{1}{w}}}\right)}$$

The absolute difference is:

$$|\tilde{p}(q) - \hat{p}(q)| = \left| \Phi(-\delta) - \Phi\left(-\delta \frac{1}{\sqrt{1 - \frac{1}{w}}}\right) \right|$$

The apparently preventive case is symmetrical because, whereas  $\delta > 0$  for an upper bound in the causative case,  $\delta < 0$  for an upper bound in the preventive case (see Table 1 in the main text), and in the above expression,  $-\delta$  is also replaced with  $\delta$  for the apparently preventive case (see Section 4.1 in the main text). A comparable symmetry argument holds for lower bounds. Table S1 displays  $\frac{\tilde{p}(q)}{\hat{p}(q)}$  as a function of  $|\delta|$  and  $w$  and illustrates that, on the ratio scale, the homogeneous-bias approximation holds most closely for small  $|\delta|$  and large  $w$ ; that is, when  $q$  is chosen to be relatively close to the bias-corrected mean estimate and when  $\sigma_{B^*}^2$  is small compared to  $\tau_c^2$ . Table S2 displays  $|\tilde{p}(q) - \hat{p}(q)|$  and illustrates that the large ratios in the lower left of Table S1 correspond to cases in which  $\hat{p}(q)$  and  $\tilde{p}(q)$  are both very small, such that a large ratio corresponds to a small absolute difference.

**Table S1:** *Ratio of homogeneous-bias approximation with  $\sigma_{B^*}^2 = 0$  to the unbiased estimate,  $\hat{p}(q)$ .*

|                   | $w = 1.5$ | 2     | 4    | 6    | 8    | 10   |
|-------------------|-----------|-------|------|------|------|------|
| $ \delta  = 0.25$ | 1.21      | 1.11  | 1.04 | 1.02 | 1.02 | 1.01 |
| 0.5               | 1.60      | 1.29  | 1.09 | 1.06 | 1.04 | 1.03 |
| 1                 | 3.81      | 2.02  | 1.28 | 1.16 | 1.11 | 1.09 |
| 1.5               | 14.25     | 3.94  | 1.60 | 1.33 | 1.23 | 1.17 |
| 2                 | 85.53     | 9.73  | 2.17 | 1.60 | 1.40 | 1.30 |
| 2.5               | 833.38    | 30.52 | 3.19 | 2.01 | 1.65 | 1.48 |

**Table S2:** Absolute difference of homogeneous-bias approximation with  $\sigma_{B^*}^2 = 0$  and the unbiased estimate,  $\hat{p}(q)$ .

|                   | $w = 1.5$ | 2    | 4    | 6    | 8    | 10   |
|-------------------|-----------|------|------|------|------|------|
| $ \delta  = 0.25$ | 0.07      | 0.04 | 0.01 | 0.01 | 0.01 | 0.01 |
| 0.5               | 0.12      | 0.07 | 0.03 | 0.02 | 0.01 | 0.01 |
| 1                 | 0.12      | 0.08 | 0.03 | 0.02 | 0.02 | 0.01 |
| 1.5               | 0.06      | 0.05 | 0.03 | 0.02 | 0.01 | 0.01 |
| 2                 | 0.02      | 0.02 | 0.01 | 0.01 | 0.01 | 0.01 |
| 2.5               | 0.01      | 0.01 | 0.00 | 0.00 | 0.00 | 0.00 |

### 3. SUFFICIENT CONDITIONS FOR APPROXIMATE NORMALITY OF BIAS FACTOR

**Lemma 3.1.** Let  $X$  and  $Y$  be iid  $N(\mu, \sigma^2)$  with  $\mu > 0$  and  $\sigma^2 \ll \mu$ . Then:

$$\log(e^X + e^Y - 1) \approx N\left(\log(2e^\mu - 1), \frac{2e^{2\mu}}{(2e^\mu - 1)^2} \sigma^2\right)$$

*Proof.* Let  $h(X, Y) = \log(e^X + e^Y - 1)$ . Then, apply a first-order Taylor expansion around  $\mu$ , dropping higher-order terms because  $\sigma^2 \ll \mu$ :

$$\begin{aligned} \frac{\partial h}{\partial X} &= \frac{e^X}{(e^X + e^Y - 1)} \\ \frac{\partial h}{\partial Y} &= \frac{e^Y}{(e^X + e^Y - 1)} \\ h(X, Y) &\approx \log(2e^\mu - 1) + \frac{e^\mu}{2e^\mu - 1} (X - \mu) + \frac{e^\mu}{2e^\mu - 1} (Y - \mu) \\ &= \left[ \log(2e^\mu - 1) - \frac{2\mu e^\mu}{2e^\mu - 1} \right] + \frac{e^\mu}{2e^\mu - 1} X + \frac{e^\mu}{2e^\mu - 1} Y \\ E[h(X, Y)] &\approx \left[ \log(2e^\mu - 1) - \frac{2\mu e^\mu}{2e^\mu - 1} \right] + \frac{e^\mu}{2e^\mu - 1} E[X] + \frac{e^\mu}{2e^\mu - 1} E[Y] \\ &= \log(2e^\mu - 1) \\ \text{Var}(h(X, Y)) &\approx \frac{2e^{2\mu}}{(2e^\mu - 1)^2} \sigma^2 \end{aligned}$$

The result then follows from the fact that  $h(X, Y)$  is approximately a linear combination of Normal random variables.  $\square$

**Theorem 3.1.** *Suppose  $\log RR_{XU}$  and  $\log RR_{UY}$  are iid  $N(\mu_U, \sigma_U^2)$ . Then  $\log B^+$  is approximately normal.*

*Proof.* We have  $\log B^+ = \log(RR_{XU}) + \log(RR_{UY}) - \log(RR_{XU} + RR_{UY} - 1)$ ; the result follows immediately from invoking Lemma 3.1 for the last term.  $\square$

#### 4. INTRODUCTION TO THE PACKAGE EVALUE

Here we briefly summarize the functions contained in the package `EValue`; details and examples are available in the standard `R` documentation.

The function `confounded_meta` computes point estimates, standard errors, and confidence interval bounds for (1) the proportion of studies with true effect sizes above  $q$  (or below  $q$  for an apparently preventive  $\hat{y}_R^c$ ) as a function of the bias parameters; (2) the minimum bias factor on the relative risk scale ( $\hat{T}(r, q)$ ) required to reduce to less than  $r$  the proportion of studies with true effect sizes more extreme than  $q$ ; and (3) the counterpart to (2) in which bias is parameterized as the minimum relative risk for both confounding associations ( $\hat{G}(r, q)$ ).

The function `sens_table` produces several types of tables (returned as dataframes) at the user's specification. The `prop` option yields a table showing the proportion of true effect sizes more extreme than  $q$  across a grid of bias parameters  $\mu_{B^*}$  and  $\sigma_{B^*}$ . Alternatively, the `Tmin` and `Gmin` options yield tables showing the minimum bias factor (as in Table 2) or confounding strength required to reduce to less than  $r$  the proportion of true effects more extreme than  $q$  (across a grid of  $r$  and  $q$ ).

The function `sens_plot` produces two types of plots. With the `line` option, the plot shows the bias factor on the relative risk scale (with pointwise 95% confidence band) versus the proportion of studies with true relative risks more extreme than  $q$  (as in Figure 1). The plot includes a secondary, rescaled  $X$ -axis showing the minimum strength of confounding to produce the given bias factor. With the `dist` option, the plot overlays the estimated densities of the confounded effects and of the true effects for a user-provided range of  $\mu_{B^*}$  and scalar  $\sigma_{B^*}$ .

The function `scrape_meta` is designed to facilitate sensitivity analyses of existing meta-analyses. Given relative risks and upper bounds of 95% confidence intervals from a forest plot or summary table, the function returns a dataframe ready for meta-analysis (e.g., via the `metafor` package) with the log-RRs and their variances. Optionally, the user may indicate studies for which the point estimates represent odds ratios of a common outcome rather than relative risks; for such studies, the function first applies a square-root transformation to convert the odds ratio to an approximate risk ratio (VanderWeele, 2017).

## 5. CODE TO REPRODUCE APPLIED EXAMPLE

The below code reproduces the applied example in Section 8. Extended code is also maintained at <https://osf.io/2r3gm/>.

```
# was run on R 3.3.3
# get data from Trock et al.'s Table 1
RRs = c(0.4, 1.8, 0.78, 0.96, 0.9, 1.4, 0.66, 0.76, 0.47,
        0.5, 2.0, 1.07, 0.66, 1.00, 0.83, 0.61, 1.0, 0.46,
        0.47, 1.16 )
UBs = c(0.8, 3.6, 1.0, 1.31, 1.3, 3.0, 0.88, 1.18, 1.33,
        1.1, 4.3, 1.47, 1.02, 1.30, 1.51, 0.97, 1.3, 0.84,
        0.74, 1.39 )

# compute point estimates and within-study variances
library(EValue) # version 1.1.0
d = scrape_meta( type = "RR", est = RRs, hi = UBs )

# meta-analyze
library(metafor) # version 2.0-0
m = rma.uni(yi=d$yi, vi=d$vyi, method="PM", measure="RR", test="knha")
yr = as.numeric(m$b) # returned estimate is on log scale
vyr = as.numeric(m$vb) # this is the KNHA-adjusted SE^2
t2 = m$tau2
```

```
vt2 = m$se.tau2^2

# reproduce Figure 1
library(ggplot2)
sens_plot( type="line",
           q=log(0.9),
           Bmin=log(1),
           Bmax=log(2),
           sigB=0.1,
           yr=yr,
           vyr=vyr,
           t2=t2,
           vt2=vt2,
           breaks.x1=seq(1, 2, .25) )

# now for just one choice of sensitivity parameters
# represents a single cross-section of the plot (at muB = log(1.25))
confounded_meta( q = log(.90),
                 muB = log(1.25),
                 sigB = 0.10,
                 yr=yr,
                 vyr = vyr,
                 t2 = t2,
                 vt2 = vt2,
                 CI.level = 0.95)

# reproduce Tmin in Table 2
sens_table( meas="Tmin",
            q=c( log(0.70), log(0.80), log(0.90) ),
            r=seq(0.1, 0.5, 0.1),
            yr=yr,
            t2=t2 )
```



```
# reproduce Gmin in Table 2
sens_table( meas="Gmin",
            q=c( log(0.70), log(0.80), log(0.90) ),
            r=seq(0.1, 0.5, 0.1),
            yr=yr,
            t2=t2 )
```

REFERENCES

- DerSimonian, R., & Laird, N. (1986). Meta-analysis in clinical trials. *Controlled Clinical Trials*, 7(3), 177–188.
- Ding, P., & VanderWeele, T. J. (2016). Sensitivity analysis without assumptions. *Epidemiology*, 27(3), 368.
- Hedges, L., & Olkin, I. (1985). *Statistical methods for meta-analysis*. Academic Press.
- Paule, R. C., & Mandel, J. (1982). Consensus values and weighting factors. *Journal of Research of the National Bureau of Standards*, 87(5), 377–385.
- Sidik, K., & Jonkman, J. N. (2005). Simple heterogeneity variance estimation for meta-analysis. *Journal of the Royal Statistical Society: Series C (Applied Statistics)*, 54(2), 367–384.
- VanderWeele, T. J. (2017). On a square-root transformation of the odds ratio for a common outcome. *Epidemiology*, 28(6), e58–e60.
